# Supplementary material
Source: publisher figshare collection journal article supplement (https://frontiersin.figshare.com/ndownloader/files/13570343)
Supplement: Supplementary file 1 [file 13570343]

## Sheet: Sheet1
Supplementary Table 2. Bray Curtis dissimilarity between pairs of studied site within grassland, tapia woodland and forest
Vegetation type		Grassland																								Tapia woodland																				Forest
	Site number	4	7	15	20	21	22	43	44	49	60	116	118	120	121	122	124	128	130	132	137	138	140	142	144	16	47	117	119	123	126	127	129	131	133	135	136	139	141	143	145	146	147	148	149	IT-01	IT-07	IT-22	IT-23
Grassland	4	0	0.6	1	1	1	1	1	1	1	1	1	1	1	1	1	1	1	1	1	1	1	1	1	1	1	1	1	1	1	1	1	1	1	1	1	1	1	1	1	1	1	1	1	1	1	1	1	1
	7	0.6	0	1	1	1	0.846154	0.909091	0.857143	0.8	1	0.818182	0.846154	0.846154	0.833333	0.818182	0.818182	0.875	0.833333	0.882353	0.8	0.818182	1	0.857143	0.866667	1	0.904762	0.818182	0.777778	0.857143	0.894737	0.857143	0.777778	0.857143	0.777778	0.857143	0.866667	0.833333	0.857143	0.866667	0.909091	0.846154	0.833333	0.894737	0.833333	1	1	1	1
	15	1	1	0	0.846154	0.6	0.428571	0.826087	0.866667	0.454545	0.636364	0.666667	0.714286	0.714286	0.692308	0.666667	0.666667	0.764706	0.692308	0.777778	0.636364	0.666667	0.666667	0.733333	0.625	0.166667	0.909091	0.666667	0.6	0.733333	0.8	0.733333	0.6	0.733333	0.6	0.866667	0.75	0.692308	0.733333	0.625	0.826087	0.714286	0.692308	0.8	0.692308	1	1	1	1
	20	1	1	0.846154	0	0.538462	0.764706	0.461538	0.555556	0.857143	0.857143	0.733333	0.647059	0.882353	0.875	0.866667	0.733333	0.6	0.75	0.714286	0.857143	0.866667	0.6	0.777778	0.894737	0.866667	0.6	0.866667	0.846154	0.666667	0.73913	0.777778	0.846154	0.777778	0.846154	0.888889	0.894737	0.875	0.666667	0.894737	0.769231	0.764706	0.875	0.652174	0.625	1	1	1	1
	21	1	1	0.6	0.538462	0	0.714286	0.652174	0.6	0.636364	0.818182	0.666667	0.571429	0.714286	0.692308	0.666667	0.5	0.647059	0.538462	0.666667	0.636364	0.666667	0.5	0.733333	0.75	0.666667	0.818182	0.666667	0.6	0.6	0.6	0.733333	0.6	0.6	0.6	0.866667	0.75	0.692308	0.466667	0.75	0.73913	0.714286	0.692308	0.6	0.538462	1	1	1	1
	22	1	0.846154	0.428571	0.764706	0.714286	0	0.62963	0.684211	0.6	0.6	0.625	0.666667	0.666667	0.647059	0.625	0.625	0.714286	0.647059	0.727273	0.6	0.625	0.75	0.578947	0.5	0.5	0.769231	0.625	0.571429	0.684211	0.75	0.684211	0.571429	0.684211	0.571429	0.578947	0.6	0.529412	0.684211	0.5	0.703704	0.666667	0.647059	0.75	0.647059	1	1	1	1
	43	1	0.909091	0.826087	0.461538	0.652174	0.62963	0	0.5	0.666667	0.833333	0.68	0.481481	0.703704	0.692308	0.6	0.52	0.466667	0.538462	0.354839	0.583333	0.6	0.52	0.5	0.724138	0.84	0.485714	0.68	0.652174	0.5	0.454545	0.571429	0.73913	0.571429	0.652174	0.714286	0.517241	0.692308	0.571429	0.724138	0.555556	0.555556	0.692308	0.454545	0.384615	1	1	1	1
	44	1	0.857143	0.866667	0.555556	0.6	0.684211	0.5	0	0.625	0.75	0.411765	0.578947	0.684211	0.777778	0.647059	0.647059	0.545455	0.555556	0.565217	0.625	0.647059	0.647059	0.6	0.619048	0.882353	0.407407	0.647059	0.6	0.6	0.52	0.6	0.6	0.5	0.6	0.5	0.619048	0.666667	0.4	0.619048	0.642857	0.578947	0.777778	0.44	0.444444	1	1	1	1
	49	1	0.8	0.454545	0.857143	0.636364	0.6	0.666667	0.625	0	0.666667	0.384615	0.6	0.333333	0.428571	0.384615	0.538462	0.555556	0.428571	0.578947	0.333333	0.384615	0.538462	0.5	0.529412	0.538462	0.73913	0.384615	0.272727	0.375	0.52381	0.5	0.454545	0.5	0.272727	0.625	0.529412	0.571429	0.5	0.529412	0.583333	0.466667	0.571429	0.619048	0.428571	1	1	1	1
	60	1	1	0.636364	0.857143	0.818182	0.6	0.833333	0.75	0.666667	0	0.846154	0.733333	0.733333	0.428571	0.692308	0.692308	0.888889	0.714286	0.894737	0.833333	0.692308	0.846154	0.625	0.294118	0.692308	0.826087	0.846154	0.636364	0.75	0.619048	0.75	0.636364	0.75	0.818182	0.5	0.647059	0.714286	0.875	0.294118	0.666667	0.866667	0.857143	0.904762	0.857143	1	1	1	1
	116	1	0.818182	0.666667	0.733333	0.666667	0.625	0.68	0.411765	0.384615	0.846154	0	0.625	0.5	0.6	0.428571	0.571429	0.473684	0.466667	0.6	0.384615	0.428571	0.571429	0.529412	0.555556	0.714286	0.666667	0.285714	0.333333	0.529412	0.545455	0.411765	0.333333	0.411765	0.333333	0.529412	0.555556	0.466667	0.411765	0.555556	0.68	0.375	0.6	0.545455	0.466667	1	1	1	1
	118	1	0.846154	0.714286	0.647059	0.571429	0.666667	0.481481	0.578947	0.6	0.733333	0.625	0	0.666667	0.294118	0.25	0.25	0.428571	0.176471	0.363636	0.466667	0.25	0.375	0.263158	0.5	0.75	0.615385	0.625	0.428571	0.368421	0.333333	0.368421	0.428571	0.263158	0.571429	0.578947	0.4	0.529412	0.473684	0.5	0.481481	0.555556	0.647059	0.5	0.411765	1	1	1	1
	120	1	0.846154	0.714286	0.882353	0.714286	0.666667	0.703704	0.684211	0.333333	0.733333	0.5	0.666667	0	0.529412	0.5	0.625	0.52381	0.529412	0.636364	0.466667	0.5	0.625	0.578947	0.6	0.75	0.615385	0.25	0.428571	0.368421	0.5	0.368421	0.571429	0.578947	0.428571	0.684211	0.5	0.647059	0.473684	0.6	0.555556	0.444444	0.529412	0.5	0.529412	1	0.857143	1	1
	121	1	0.833333	0.692308	0.875	0.692308	0.647059	0.692308	0.777778	0.428571	0.428571	0.6	0.294118	0.529412	0	0.2	0.333333	0.6	0.25	0.619048	0.428571	0.2	0.6	0.333333	0.263158	0.733333	0.76	0.6	0.384615	0.444444	0.391304	0.444444	0.384615	0.333333	0.538462	0.444444	0.368421	0.5	0.555556	0.263158	0.461538	0.529412	0.625	0.565217	0.5	1	1	1	1
	122	1	0.818182	0.666667	0.866667	0.666667	0.625	0.6	0.647059	0.384615	0.692308	0.428571	0.25	0.5	0.2	0	0.285714	0.473684	0.0666667	0.5	0.230769	0	0.428571	0.176471	0.444444	0.714286	0.666667	0.428571	0.166667	0.411765	0.454545	0.294118	0.333333	0.176471	0.333333	0.411765	0.222222	0.466667	0.411765	0.444444	0.52	0.375	0.6	0.454545	0.333333	1	1	1	1
	124	1	0.818182	0.666667	0.733333	0.5	0.625	0.52	0.647059	0.538462	0.692308	0.571429	0.25	0.625	0.333333	0.285714	0	0.368421	0.2	0.4	0.384615	0.285714	0.428571	0.411765	0.555556	0.714286	0.666667	0.571429	0.333333	0.411765	0.363636	0.411765	0.333333	0.294118	0.5	0.647059	0.333333	0.333333	0.411765	0.555556	0.6	0.375	0.466667	0.454545	0.2	1	1	1	1
	128	1	0.875	0.764706	0.6	0.647059	0.714286	0.466667	0.545455	0.555556	0.888889	0.473684	0.428571	0.52381	0.6	0.473684	0.368421	0	0.4	0.2	0.333333	0.473684	0.263158	0.363636	0.73913	0.789474	0.586207	0.578947	0.529412	0.181818	0.333333	0.363636	0.647059	0.454545	0.529412	0.727273	0.478261	0.6	0.363636	0.73913	0.666667	0.238095	0.5	0.333333	0.3	1	1	1	1
	130	1	0.833333	0.692308	0.75	0.538462	0.647059	0.538462	0.555556	0.428571	0.714286	0.466667	0.176471	0.529412	0.25	0.0666667	0.2	0.4	0	0.428571	0.285714	0.0666667	0.333333	0.222222	0.473684	0.733333	0.6	0.466667	0.230769	0.333333	0.391304	0.333333	0.384615	0.111111	0.384615	0.444444	0.263158	0.5	0.333333	0.473684	0.461538	0.411765	0.625	0.391304	0.25	1	1	1	1
	132	1	0.882353	0.777778	0.714286	0.666667	0.727273	0.354839	0.565217	0.578947	0.894737	0.6	0.363636	0.636364	0.619048	0.5	0.4	0.2	0.428571	0	0.368421	0.5	0.3	0.391304	0.75	0.8	0.533333	0.6	0.555556	0.304348	0.357143	0.478261	0.666667	0.478261	0.555556	0.73913	0.5	0.619048	0.478261	0.75	0.548387	0.454545	0.52381	0.428571	0.333333	1	1	1	1
	137	1	0.8	0.636364	0.857143	0.636364	0.6	0.583333	0.625	0.333333	0.833333	0.384615	0.466667	0.466667	0.428571	0.230769	0.384615	0.333333	0.285714	0.368421	0	0.230769	0.230769	0.25	0.647059	0.692308	0.652174	0.384615	0.272727	0.25	0.52381	0.375	0.454545	0.375	0.272727	0.625	0.411765	0.571429	0.375	0.647059	0.666667	0.333333	0.428571	0.52381	0.285714	1	1	1	1
	138	1	0.818182	0.666667	0.866667	0.666667	0.625	0.6	0.647059	0.384615	0.692308	0.428571	0.25	0.5	0.2	0	0.285714	0.473684	0.0666667	0.5	0.230769	0	0.428571	0.176471	0.444444	0.714286	0.666667	0.428571	0.166667	0.411765	0.454545	0.294118	0.333333	0.176471	0.333333	0.411765	0.222222	0.466667	0.411765	0.444444	0.52	0.375	0.6	0.454545	0.333333	1	1	1	1
	140	1	1	0.666667	0.6	0.5	0.75	0.52	0.647059	0.538462	0.846154	0.571429	0.375	0.625	0.6	0.428571	0.428571	0.263158	0.333333	0.3	0.230769	0.428571	0	0.294118	0.777778	0.714286	0.666667	0.571429	0.5	0.176471	0.454545	0.411765	0.666667	0.411765	0.5	0.764706	0.555556	0.733333	0.411765	0.777778	0.68	0.5	0.6	0.545455	0.333333	1	1	1	1
	142	1	0.857143	0.733333	0.777778	0.733333	0.578947	0.5	0.6	0.5	0.625	0.529412	0.263158	0.578947	0.333333	0.176471	0.411765	0.363636	0.222222	0.391304	0.25	0.176471	0.294118	0	0.428571	0.764706	0.62963	0.529412	0.333333	0.3	0.44	0.3	0.466667	0.3	0.466667	0.4	0.238095	0.555556	0.5	0.428571	0.571429	0.473684	0.555556	0.52	0.444444	1	1	1	1
Tapia woodland	144	1	0.866667	0.625	0.894737	0.75	0.5	0.724138	0.619048	0.529412	0.294118	0.555556	0.5	0.6	0.263158	0.444444	0.555556	0.73913	0.473684	0.75	0.647059	0.444444	0.777778	0.428571	0	0.666667	0.785714	0.666667	0.5	0.619048	0.538462	0.52381	0.375	0.428571	0.625	0.333333	0.454545	0.473684	0.714286	0	0.517241	0.7	0.684211	0.692308	0.684211	1	1	1	1
	16	1	1	0.166667	0.866667	0.666667	0.5	0.84	0.882353	0.538462	0.692308	0.714286	0.75	0.75	0.733333	0.714286	0.714286	0.789474	0.733333	0.8	0.692308	0.714286	0.714286	0.764706	0.666667	0	0.916667	0.714286	0.666667	0.764706	0.818182	0.764706	0.666667	0.764706	0.666667	0.882353	0.777778	0.733333	0.764706	0.666667	0.84	0.75	0.733333	0.818182	0.733333	1	1	1	1
	47	1	0.904762	0.909091	0.6	0.818182	0.769231	0.485714	0.407407	0.73913	0.826087	0.666667	0.615385	0.615385	0.76	0.666667	0.666667	0.586207	0.6	0.533333	0.652174	0.666667	0.666667	0.62963	0.785714	0.916667	0	0.583333	0.727273	0.62963	0.625	0.62963	0.818182	0.555556	0.636364	0.62963	0.5	0.84	0.407407	0.785714	0.428571	0.538462	0.68	0.5	0.52	1	1	1	1
	117	1	0.818182	0.666667	0.866667	0.666667	0.625	0.68	0.647059	0.384615	0.846154	0.285714	0.625	0.25	0.6	0.428571	0.571429	0.578947	0.466667	0.6	0.384615	0.428571	0.571429	0.529412	0.666667	0.714286	0.583333	0	0.333333	0.529412	0.545455	0.411765	0.5	0.529412	0.333333	0.647059	0.444444	0.6	0.411765	0.666667	0.6	0.5	0.466667	0.545455	0.466667	1	1	1	1
	119	1	0.777778	0.6	0.846154	0.6	0.571429	0.652174	0.6	0.272727	0.636364	0.333333	0.428571	0.428571	0.384615	0.166667	0.333333	0.529412	0.230769	0.555556	0.272727	0.166667	0.5	0.333333	0.5	0.666667	0.727273	0.333333	0	0.466667	0.5	0.333333	0.2	0.333333	0.2	0.466667	0.375	0.384615	0.466667	0.5	0.565217	0.428571	0.538462	0.6	0.384615	1	1	1	1
	123	1	0.857143	0.733333	0.666667	0.6	0.684211	0.5	0.6	0.375	0.75	0.529412	0.368421	0.368421	0.444444	0.411765	0.411765	0.181818	0.333333	0.304348	0.25	0.411765	0.176471	0.3	0.619048	0.764706	0.62963	0.529412	0.466667	0	0.28	0.3	0.6	0.4	0.466667	0.7	0.52381	0.666667	0.4	0.619048	0.571429	0.368421	0.555556	0.44	0.333333	1	1	1	1
	126	1	0.894737	0.8	0.73913	0.6	0.75	0.454545	0.52	0.52381	0.619048	0.545455	0.333333	0.5	0.391304	0.454545	0.363636	0.333333	0.391304	0.357143	0.52381	0.454545	0.454545	0.44	0.538462	0.818182	0.625	0.545455	0.5	0.28	0	0.36	0.6	0.44	0.6	0.6	0.461538	0.565217	0.44	0.538462	0.454545	0.416667	0.652174	0.4	0.391304	1	1	1	1
	127	1	0.857143	0.733333	0.777778	0.733333	0.684211	0.571429	0.6	0.5	0.75	0.411765	0.368421	0.368421	0.444444	0.294118	0.411765	0.363636	0.333333	0.478261	0.375	0.294118	0.411765	0.3	0.52381	0.764706	0.62963	0.411765	0.333333	0.3	0.36	0	0.333333	0.3	0.466667	0.5	0.428571	0.444444	0.4	0.52381	0.571429	0.368421	0.555556	0.44	0.444444	1	1	1	1
	129	1	0.777778	0.6	0.846154	0.6	0.571429	0.73913	0.6	0.454545	0.636364	0.333333	0.428571	0.571429	0.384615	0.333333	0.333333	0.647059	0.384615	0.666667	0.454545	0.333333	0.666667	0.466667	0.375	0.666667	0.818182	0.5	0.2	0.6	0.6	0.333333	0	0.333333	0.4	0.466667	0.5	0.230769	0.6	0.375	0.652174	0.571429	0.538462	0.7	0.538462	1	1	1	1
	131	1	0.857143	0.733333	0.777778	0.6	0.684211	0.571429	0.5	0.5	0.75	0.411765	0.263158	0.578947	0.333333	0.176471	0.294118	0.454545	0.111111	0.478261	0.375	0.176471	0.411765	0.3	0.428571	0.764706	0.555556	0.529412	0.333333	0.4	0.44	0.3	0.333333	0	0.333333	0.3	0.238095	0.444444	0.3	0.428571	0.428571	0.368421	0.555556	0.44	0.333333	1	1	1	1
	133	1	0.777778	0.6	0.846154	0.6	0.571429	0.652174	0.6	0.272727	0.818182	0.333333	0.571429	0.428571	0.538462	0.333333	0.5	0.529412	0.384615	0.555556	0.272727	0.333333	0.5	0.466667	0.625	0.666667	0.636364	0.333333	0.2	0.466667	0.6	0.466667	0.4	0.333333	0	0.466667	0.375	0.538462	0.333333	0.625	0.565217	0.285714	0.384615	0.6	0.384615	1	1	1	1
	135	1	0.857143	0.866667	0.888889	0.866667	0.578947	0.714286	0.5	0.625	0.5	0.529412	0.578947	0.684211	0.444444	0.411765	0.647059	0.727273	0.444444	0.73913	0.625	0.411765	0.764706	0.4	0.333333	0.882353	0.62963	0.647059	0.466667	0.7	0.6	0.5	0.466667	0.3	0.466667	0	0.333333	0.444444	0.6	0.333333	0.428571	0.578947	0.666667	0.68	0.666667	1	1	1	1
	136	1	0.866667	0.75	0.894737	0.75	0.6	0.517241	0.619048	0.529412	0.647059	0.555556	0.4	0.5	0.368421	0.222222	0.333333	0.478261	0.263158	0.5	0.411765	0.222222	0.555556	0.238095	0.454545	0.777778	0.5	0.444444	0.375	0.52381	0.461538	0.428571	0.5	0.238095	0.375	0.333333	0	0.473684	0.428571	0.454545	0.517241	0.3	0.473684	0.461538	0.368421	1	1	1	1
	139	1	0.833333	0.692308	0.875	0.692308	0.529412	0.692308	0.666667	0.571429	0.714286	0.466667	0.529412	0.647059	0.5	0.466667	0.333333	0.6	0.5	0.619048	0.571429	0.466667	0.733333	0.555556	0.473684	0.733333	0.84	0.6	0.384615	0.666667	0.565217	0.444444	0.230769	0.444444	0.538462	0.444444	0.473684	0	0.666667	0.473684	0.615385	0.529412	0.5	0.652174	0.5	1	1	1	1
	141	1	0.857143	0.733333	0.666667	0.466667	0.684211	0.571429	0.4	0.5	0.875	0.411765	0.473684	0.473684	0.555556	0.411765	0.411765	0.363636	0.333333	0.478261	0.375	0.411765	0.411765	0.5	0.714286	0.764706	0.407407	0.411765	0.466667	0.4	0.44	0.4	0.6	0.3	0.333333	0.6	0.428571	0.666667	0	0.714286	0.5	0.263158	0.444444	0.28	0.333333	1	1	1	1
	143	1	0.866667	0.625	0.894737	0.75	0.5	0.724138	0.619048	0.529412	0.294118	0.555556	0.5	0.6	0.263158	0.444444	0.555556	0.73913	0.473684	0.75	0.647059	0.444444	0.777778	0.428571	0	0.666667	0.785714	0.666667	0.5	0.619048	0.538462	0.52381	0.375	0.428571	0.625	0.333333	0.454545	0.473684	0.714286	0	0.517241	0.7	0.684211	0.692308	0.684211	1	1	1	1
	145	1	0.909091	0.826087	0.769231	0.73913	0.703704	0.555556	0.642857	0.583333	0.666667	0.68	0.481481	0.555556	0.461538	0.52	0.6	0.666667	0.461538	0.548387	0.666667	0.52	0.68	0.571429	0.517241	0.84	0.428571	0.6	0.565217	0.571429	0.454545	0.571429	0.652174	0.428571	0.565217	0.428571	0.517241	0.615385	0.5	0.517241	0	0.62963	0.615385	0.515152	0.615385	1	1	1	1
	146	1	0.846154	0.714286	0.764706	0.714286	0.666667	0.555556	0.578947	0.466667	0.866667	0.375	0.555556	0.444444	0.529412	0.375	0.375	0.238095	0.411765	0.454545	0.333333	0.375	0.5	0.473684	0.7	0.75	0.538462	0.5	0.428571	0.368421	0.416667	0.368421	0.571429	0.368421	0.285714	0.578947	0.3	0.529412	0.263158	0.7	0.62963	0	0.411765	0.333333	0.294118	1	1	1	1
	147	1	0.833333	0.692308	0.875	0.692308	0.647059	0.692308	0.777778	0.571429	0.857143	0.6	0.647059	0.529412	0.625	0.6	0.466667	0.5	0.625	0.52381	0.428571	0.6	0.6	0.555556	0.684211	0.733333	0.68	0.466667	0.538462	0.555556	0.652174	0.555556	0.538462	0.555556	0.384615	0.666667	0.473684	0.5	0.444444	0.684211	0.615385	0.411765	0	0.565217	0.5	1	1	1	1
	148	1	0.894737	0.8	0.652174	0.6	0.75	0.454545	0.44	0.619048	0.904762	0.545455	0.5	0.5	0.565217	0.454545	0.454545	0.333333	0.391304	0.428571	0.52381	0.454545	0.545455	0.52	0.692308	0.818182	0.5	0.545455	0.6	0.44	0.4	0.44	0.7	0.44	0.6	0.68	0.461538	0.652174	0.28	0.692308	0.515152	0.333333	0.565217	0	0.304348	1	1	1	1
Forest	149	1	0.833333	0.692308	0.625	0.538462	0.647059	0.384615	0.444444	0.428571	0.857143	0.466667	0.411765	0.529412	0.5	0.333333	0.2	0.3	0.25	0.333333	0.285714	0.333333	0.333333	0.444444	0.684211	0.733333	0.52	0.466667	0.384615	0.333333	0.391304	0.444444	0.538462	0.333333	0.384615	0.666667	0.368421	0.5	0.333333	0.684211	0.615385	0.294118	0.5	0.304348	0	1	1	1	1
	IT-01	1	1	1	1	1	1	1	1	1	1	1	1	1	1	1	1	1	1	1	1	1	1	1	1	1	1	1	1	1	1	1	1	1	1	1	1	1	1	1	1	1	1	1	1	0	0.555556	0.428571	0.666667
	IT-07	1	1	1	1	1	1	1	1	1	1	1	1	0.857143	1	1	1	1	1	1	1	1	1	1	1	1	1	1	1	1	1	1	1	1	1	1	1	1	1	1	1	1	1	1	1	0.555556	0	0.5	0.692308
	IT-22	1	1	1	1	1	1	1	1	1	1	1	1	1	1	1	1	1	1	1	1	1	1	1	1	1	1	1	1	1	1	1	1	1	1	1	1	1	1	1	1	1	1	1	1	0.428571	0.5	0	0.636364
	IT-23	1	1	1	1	1	1	1	1	1	1	1	1	1	1	1	1	1	1	1	1	1	1	1	1	1	1	1	1	1	1	1	1	1	1	1	1	1	1	1	1	1	1	1	1	0.666667	0.692308	0.636364	0
	IT-28	1	0.777778	1	1	1	0.857143	0.913043	0.866667	0.636364	0.818182	0.833333	0.857143	0.571429	0.692308	0.833333	0.833333	0.882353	0.846154	0.888889	0.818182	0.833333	1	0.866667	0.75	1	0.818182	0.666667	0.8	0.733333	0.8	0.866667	0.8	0.866667	0.8	0.866667	0.75	0.846154	0.866667	0.75	0.826087	0.857143	0.846154	0.9	0.846154	0.777778	0.8	0.75	0.846154
	IT-29	1	1	1	1	1	1	0.916667	1	1	1	1	1	0.866667	1	1	0.846154	0.888889	1	0.894737	1	1	1	1	1	1	1	1	1	1	0.904762	1	1	1	1	1	0.882353	0.857143	1	1	1	0.866667	0.857143	0.904762	0.857143	0.6	0.272727	0.555556	0.857143
	IT-32	1	1	1	1	1	1	1	1	1	1	1	1	1	1	1	1	1	1	1	1	1	1	1	1	1	1	1	1	1	1	1	1	1	1	1	1	1	1	1	1	1	1	1	1	0.4	0.272727	0.333333	0.571429
	IT-36	1	0.833333	1	1	1	1	1	1	1	1	1	1	0.764706	1	1	1	1	1	1	1	1	1	1	1	1	0.84	0.733333	1	1	1	0.888889	1	1	1	1	0.894737	1	0.888889	1	0.923077	1	0.875	0.913043	1	0.833333	0.692308	0.818182	0.75
	IT-45	1	0.875	1	0.9	1	1	0.933333	0.909091	0.888889	0.777778	1	1	0.809524	0.8	1	1	1	1	1	1	1	1	1	0.826087	1	0.862069	0.894737	1	0.909091	0.851852	0.909091	1	1	1	0.909091	1	1	0.909091	0.826087	0.8	1	0.9	0.851852	0.9	1	0.882353	1	0.9
	13	1	1	1	1	1	1	1	1	1	1	1	1	0.833333	1	1	1	1	1	1	1	1	1	1	1	1	1	1	1	1	1	1	1	1	1	1	1	1	1	1	1	1	1	1	1	1	0.75	1	1
	17	1	1	1	1	1	1	1	1	1	1	1	1	1	1	1	1	1	1	1	1	1	1	1	1	1	1	1	1	1	1	1	1	1	1	1	1	1	1	1	1	1	1	1	1	0.333333	0.714286	0.6	0.8
	46	1	0.777778	1	1	1	1	1	1	1	1	1	1	1	1	1	1	1	1	1	1	1	1	1	1	1	1	1	1	1	1	1	1	1	1	1	1	1	1	1	1	1	1	1	1	0.555556	0.6	0.5	0.538462
[truncated: 8 more columns]
